# Supplementary material for: Chlorogenic acid mitigates high stocking density-induced breast muscle quality decline in broilers via modulating mitochondrial redox homeostasis and glycolytic metabolism
Source: Research Square preprint supplement (doi:10.21203/rs.3.rs-6862999/v1), 2025-06-27
Supplement: Supplementary file 1 [file 0ad20781b905739606378f73.docx]

**Table S1. Composition and nutrient levels of the basal diet (% dry matter).**

| Item | 1-21d | 22-42d |
| --- | --- | --- |
| Ingredients |  |  |
| Corn (CP 7.9 %) | 58.21 | 62.09 |
| Soybean meal (CP 44.3 %) | 33.11 | 31.62 |
| Fish meal (CP 62.5 %) | 2.00 | 0.00 |
| Soybean oil | 2.50 | 2.50 |
| CaCO3 | 1.30 | 1.20 |
| CaHPO4 | 1.65 | 1.70 |
| NaCl | 0.40 | 0.30 |
| Lys-HCl | 0.08 | 0.02 |
| DL-Met | 0.26 | 0.17 |
| L-Thr | 0.02 | 0.01 |
| Choline chloride | 0.15 | 0.10 |
| Premix 1 | 0.20 | 0.00 |
| Premix 2 | 0.00 | 0.20 |
| Total | 100.00 | 100.00 |
| Nutrient composition 3 | | |
| Metabolic energy, MJ/kg | 12.47 | 12.53 |
| Crude protein | 20.92 | 19.27 |
| Total Ca | 1.01 | 0.91 |
| Total P | 0.72 | 0.67 |
| Available P | 0.45 | 0.40 |
| Lys | 1.19 | 1.00 |
| Met | 0.58 | 0.46 |
| Met + Cys | 0.91 | 0.77 |
| Thr | 0.81 | 0.72 |
| Val | 0.95 | 0.87 |
| Trp | 0.23 | 0.21 |

1 Premix for 0–3 wk broiler provided (per kilogram): Cu (CuSO4·5H2O), 8 mg; Fe (FeSO4·7H2O), 100 mg; Mn (MnSO4·H2O), 120 mg; Zn (ZnSO4·H2O), 100 mg; I (KI), 0.7 mg; vitamin A, 8000 IU; vitamin D3, 2000 IU; vitamin E, 20 IU; vitamin K3, 3.2 mg; vitamin B1, 2 mg; vitamin B2, 6.4 mg; vitamin B6, 4 mg; vitamin B12, 0.2 mg; D-biotin, 1.1 mg; D-pantothenic acid, 12 mg; folic acid, 1 mg; nicotinamide, 40 mg.

2 Premix for 4–6 wk broiler provided (per kilogram): Cu (CuSO4·5H2O), 8 mg; Fe (FeSO4·7H2O), 80 mg; Mn (MnSO4·H2O), 100 mg; Zn (ZnSO4·H2O), 80 mg; I (KI), 0.7 mg; vitamin A, 6000 IU; vitamin D3, 1500 IU; vitamin E, 15 IU; vitamin K3, 2.4 mg; vitamin B1, 1.5 mg; vitamin B2, 4.8 mg; vitamin B6, 3 mg; vitamin B12, 0.15 mg; D-biotin, 0.825 mg; D-pantothenic acid, 9 mg; folic acid, 0.75 mg; nicotinamide, 30 mg.

3 The nutrient levels (crude protein, total Ca, total P) are measured values. The metabolic energy are calculated

**Table S2. Primers used for the RT-PCR.**

| Gene1 | Primer sequence (5’-3’)2 | Length (nt) | GenBank number |
| --- | --- | --- | --- |
| HSP60 | F: GGGACCTGAAACCAGAGAACG  R: ACAGAGGAGGGCATAGAGGATG | 215 | NM_205055 |
| HSP70 | F: AACGAGTCGGGCTACTACCT  R: ATCAGCATCCCGTGAAGTGG | 119 | NM_205018 |
| CLPP | F: GTGGATGCCTACAGGACCAT  R: TGATGAGGTCGTAGGTGACG | 124 | NM_001031665 |
| CLPX | F: GATTTCTGCTGCTTCCAATTCG  R: TGCAGCGCGATCTGAATG | 92 | NM_001199955 |
| HK1 | F: GCTCCTGGCCTACTACTTCAC  R: GACCTCACAAAGGTAGGGAGC | 195 | NM_204101.2 |
| PFKM | F: CCCATTTCCCTCTTTTTCAGCC  R: GCCCTCATGCACGAAGTAGA | 196 | NM_204223.2 |
| PGK | F: CAGCGGTGACTTGCGATAAC  R: AGTCAACCCTCATGACGACC | 94 | NM_204985.4 |
| PKM | F: GCAGCTTCGGTGCCTGTGGTT  R: GCTGCTTGGCCCACACCTCC | 119 | NM_205469.2 |
| PDK4 | F: TCGACAGACTCCTCTTGCTG  R: GCATCTGTTCCATAGCCACA | 114 | NM_001199909 |
| LDHA | F: TGTCTGGAGCGGAGTGAATG  R: CCTCATAGGCACTGTCCACC | 125 | NM_205284.2 |
| mTOP | F: ATGGCTTCCAAGGCTATCGG  R: TCCAGAGCACGTTTCACCTC | 89 | XM_040689168.2 |
| 4EBP1 | F: CGGGCGGAACCAGGATTATT  R: CGGAGAATTACGGCACTCCA | 59 | XM_040689367.2 |
| S6k1 | F: TTCACACCCGCGCTATGG  R: CTCCAGCTCCTCATCCGAAC | 80 | NM_001030721.2 |
| GAPDH | F: TGCTGCCCAGAACATCATCC  R: ACGGCAGGTCAGGTCAACAA | 113 | NM_204305 |

1HSP60 = Heat Shock Protein 60; HSP70 = Heat Shock Protein 70; CLPP = Caseinolytic peptidase P; CLPX = Caseinolytic peptidase X; HK1 = Hexokinase 1; PFKM = Phosphofructokinase, *muscle*; PGK = Phosphoglycerate kinase; PKM = Pyruvate kinase, *muscle*; PDK4 = Pyruvate dehydrogenase kinase 4; LDHA = Lactate dehydrogenase A; mTOR = Mechanistic target of rapamycin; 4EBP1 = Eukaryotic translation initiation factor 4E - binding protein 1; S6K1= Ribosomal protein S6 kinase; GAPDH = Glyceraldehyde-3-phosphate dehydrogenase.

2F = forward primer; R = reverse primer.

**Table S3. Primary antibodies for the** **western blot analyses.**

| Antibody1 | Company | Address | Commodity code | Dilution ratio |
| --- | --- | --- | --- | --- |
| GAPDH | Proteintech Group | Illinois, USA | 60004-1-Ig | 1:5000 |
| CLPP | Zen BioScience | Chengdu, China | R23947 | 1:1000 |
| CLPX | Zen BioScience | Chengdu, China | R26609 | 1:1000 |
| Slow MyHC | Servicebio | Wuhan, China | GB111857-100 | 1:1000 |
| Fast MyHC | Servicebio | Wuhan, China | GB112130-100 | 1:1000 |
| 1GAPDH = Glyceraldehyde-3-phosphate dehydrogenase; CLPP = Caseinolytic peptidase P; CLPX = Caseinolytic peptidase X; Slow MyHC = Slow Myosin Heavy Chain; Fast MyHC = Fast Slow Myosin Heavy Chain; | | | | |

**Table. Assay enzyme or metabolites activity**

| Enzyme / metabolites | Company | Address | Available kits (No.) |
| --- | --- | --- | --- |
| MDA (Serun) | Nanjing Jiancheng Bioengineering Institute | Nanjing, China | A-005-1-2 |
| T-SOD (Serun) | Nanjing Jiancheng Bioengineering Institute | Nanjing, China | A-003-1-2 |
| GSH-PX (Serun) | Nanjing Jiancheng Bioengineering Institute | Nanjing, China | A-015-2-1 |
| T-AOC (Serun) | Nanjing Jiancheng Bioengineering Institute | Nanjing, China | A-001-3-2 |
| Lactic acid | Nanjing Jiancheng Bioengineering Institute | Nanjing, China | A043-1-1 |
| Glucose | Nanjing Jiancheng Bioengineering Institute | Nanjing, China | A154-1-1 |
| Glycogen | Nanjing Jiancheng Bioengineering Institute | Nanjing, China | A019-2-1 |
| Citric acid | Nanjing Jiancheng Bioengineering Institute | Nanjing, China | A081-1-1 |
| Pyruvate | Nanjing Jiancheng Bioengineering Institute | Nanjing, China | A128-1-1 |
| ATP | Nanjing Jiancheng Bioengineering Institute | Nanjing, China | A003-1 |
| MDA (muscle) | Nanjing Jiancheng Bioengineering Institute | Nanjing, China | A095-1-1 |

**Table. Assay enzyme or metabolites activity**

| Enzyme / metabolites | Company | Address | Available kits (No.) |
| --- | --- | --- | --- |
| Oxaloacetate | Shanghai Enzyme-linked Biotechnology | Shanghai, China | YJ711921 |
| Acetyl-CoA | Shanghai Enzyme-linked Biotechnology | Shanghai, China | YJ792302 |
| Isocitrate dehydrogenase | Shanghai Enzyme-linked Biotechnology | Shanghai, China | YJ292912 |
| Citroyl synthetase | Shanghai Enzyme-linked Biotechnology | Shanghai, China | YJ719222 |
| ROS | Jiangsu Meimian Industrial | Nanjing, China | MM-6012001 |
| MDH | Nanjing Jiancheng Bioengineering Institute | Nanjing, China | A020-1-2 |
| SDH | Nanjing Jiancheng Bioengineering Institute | Nanjing, China | A022-1-1 |
| LDH | Nanjing Jiancheng Bioengineering Institute | Nanjing, China | A021-2-1 |
| T-SOD (muscle) | Nanjing Jiancheng Bioengineering Institute | Nanjing, China | A005-1 |
| T-AOC (muscle) | Nanjing Jiancheng Bioengineering Institute | Nanjing, China | A015-1 |
| GSH-Px (muscle) | Nanjing Jiancheng Bioengineering Institute | Nanjing, China | A001-1-1 |
| Protein content | Nanjing Jiancheng Bioengineering Institute | Nanjing, China | A045-3 |
